# Supplementary material for: Prognostic and Therapeutic Potential of the OIP5 Network in Papillary Renal Cell Carcinoma
Source: MDPI journal article supplement (doi:10.3390/cancers13174483), 2021-09-06
Supplement: s1 [file s1]

Figure S8

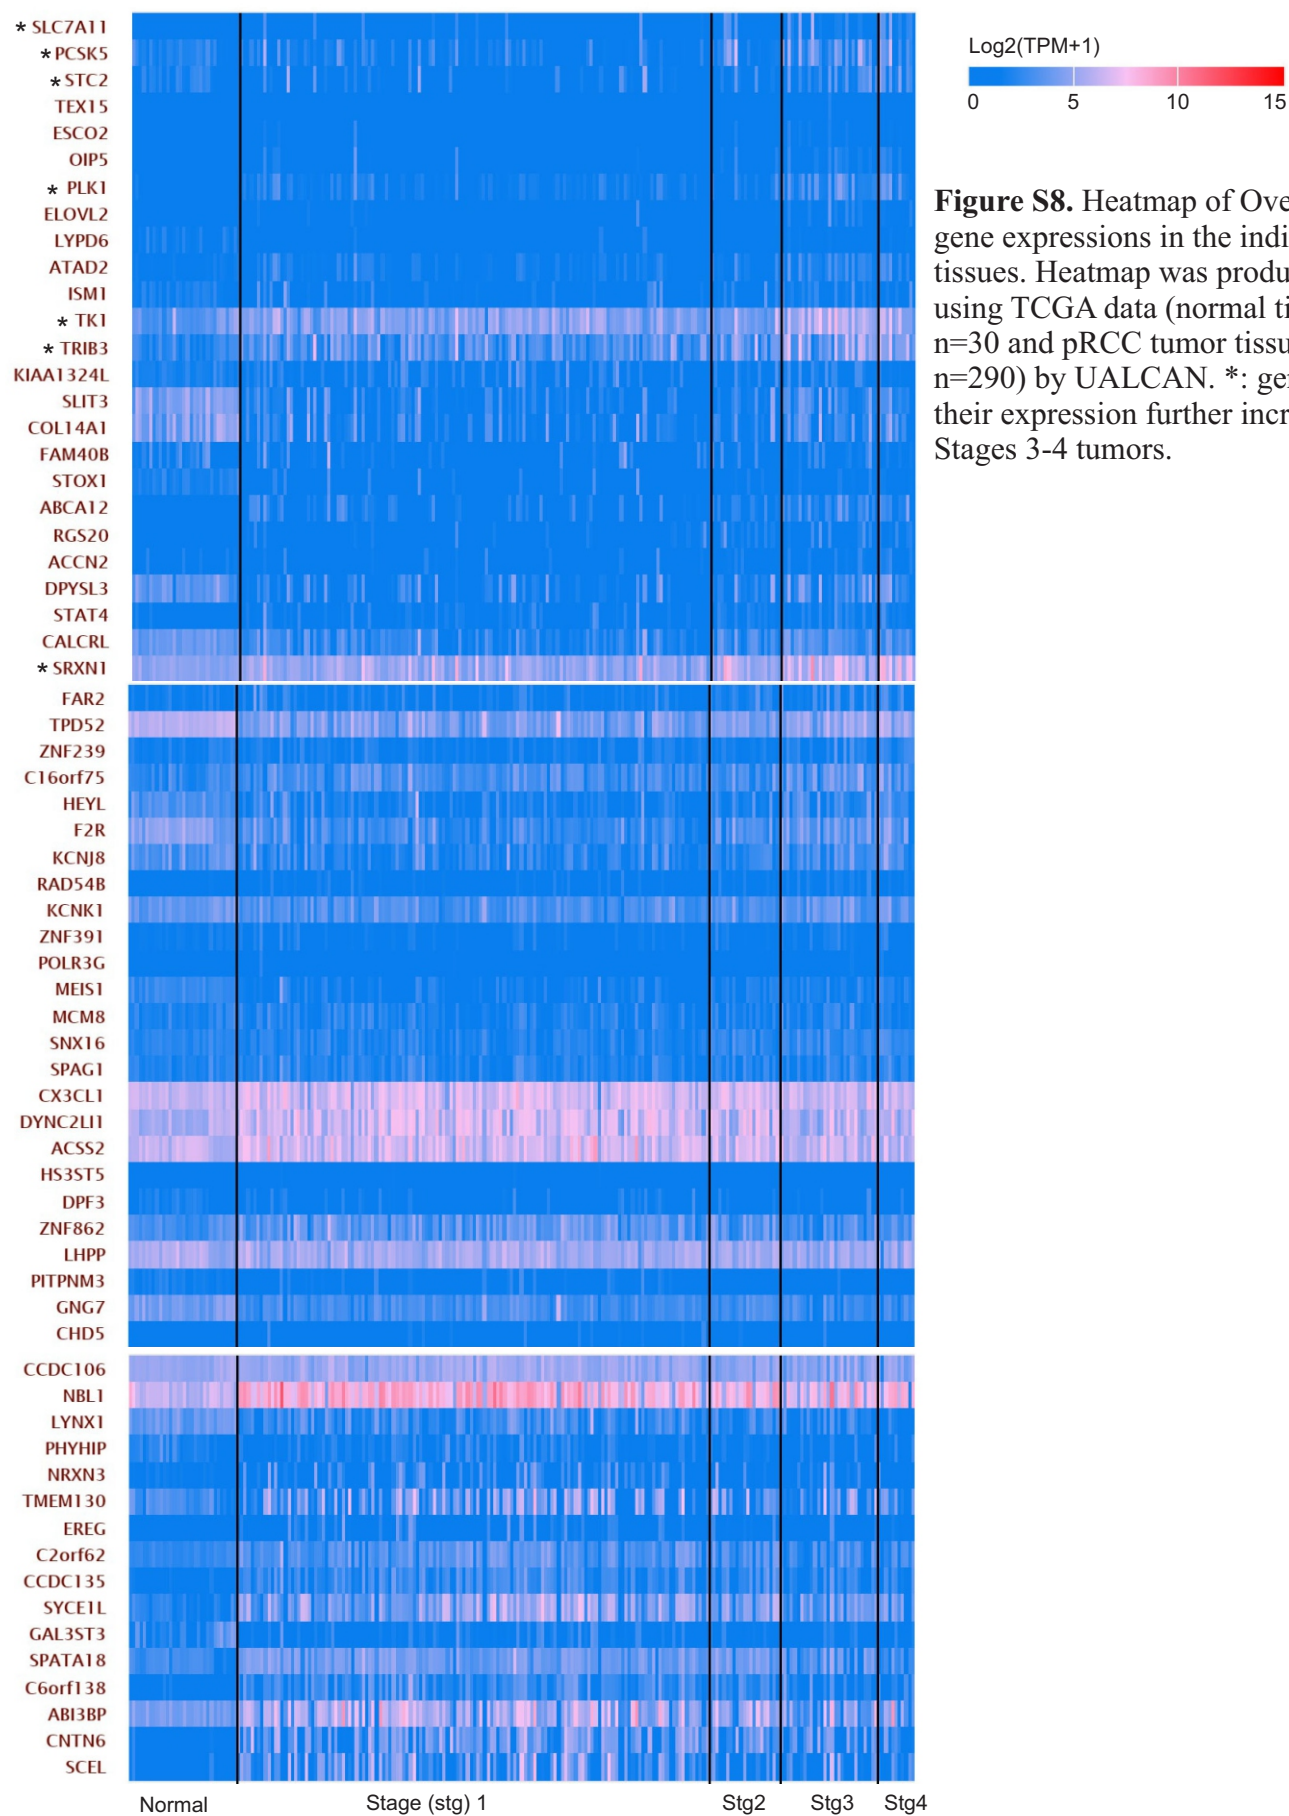

**Figure S8.** Heatmap of Overlap66 gene expressions in the indicated tissues. Heatmap was produced using TCGA data (normal tissues n=30 and pRCC tumor tissues n=290) by UALCAN. \*: genes with their expression further increases in Stages 3-4 tumors.
