# Supplementary material for: Prognostic and Therapeutic Potential of the OIP5 Network in Papillary Renal Cell Carcinoma
Source: MDPI journal article supplement (doi:10.3390/cancers13174483), 2021-09-06
Supplement: s1 [file s1]

Figure S3

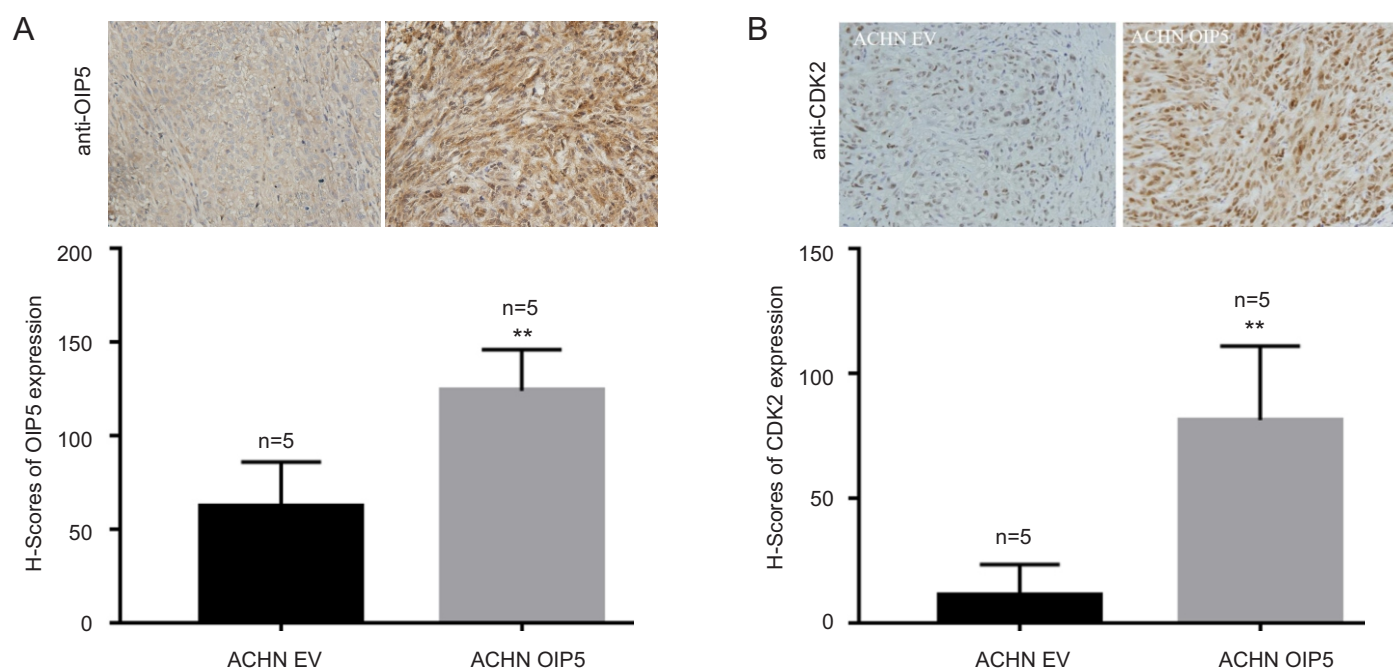

**Figure S3.** Increases in OIP5 and CDK2 expression in ACHN OIP5 tumors. Typical images for OIP5 (**A**) and CDK2 (**B**) expression and quantification. \*\*:  $p < 0.01$  compared ACHN EV tumors by 2-tailed Student's t-test.
