# Supplementary material for: Prognostic and Therapeutic Potential of the OIP5 Network in Papillary Renal Cell Carcinoma
Source: MDPI journal article supplement (doi:10.3390/cancers13174483), 2021-09-06
Supplement: s1 [file s1]

Figure S6

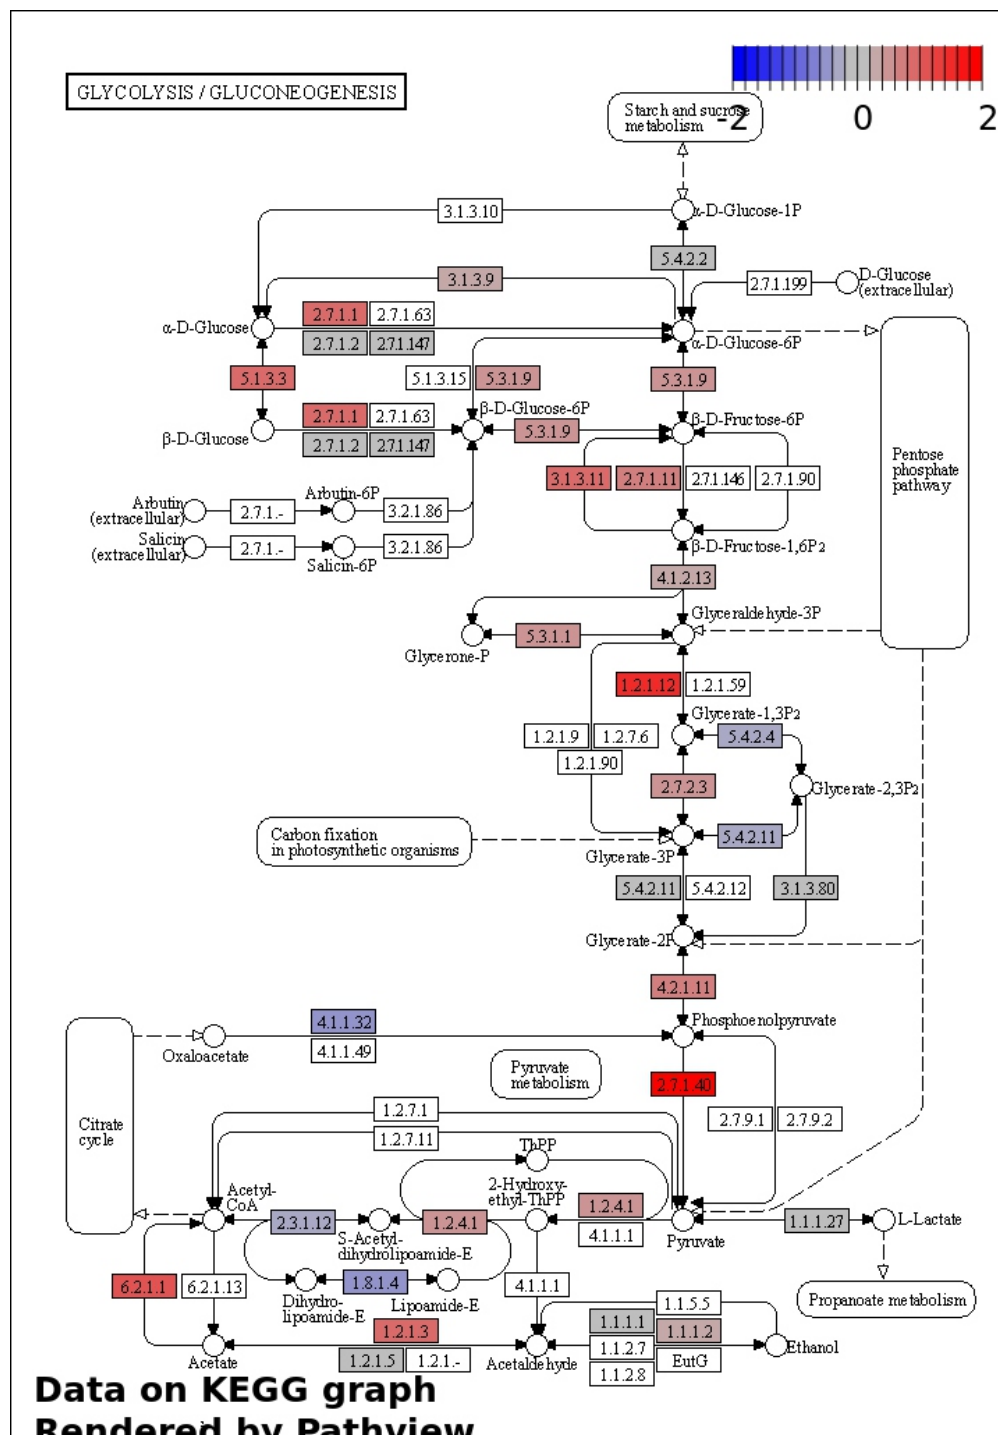

**Figure S6.** Enhancement of the glycolysis pathway in ACHN OIP5 tumors. Pathway analysis was performed using EGSEA with the involvement all 12 algorithms by UseGalaxy.org.
