# Supplementary material for: Prognostic and Therapeutic Potential of the OIP5 Network in Papillary Renal Cell Carcinoma
Source: MDPI journal article supplement (doi:10.3390/cancers13174483), 2021-09-06
Supplement: s1 [file s1]

Figure S2

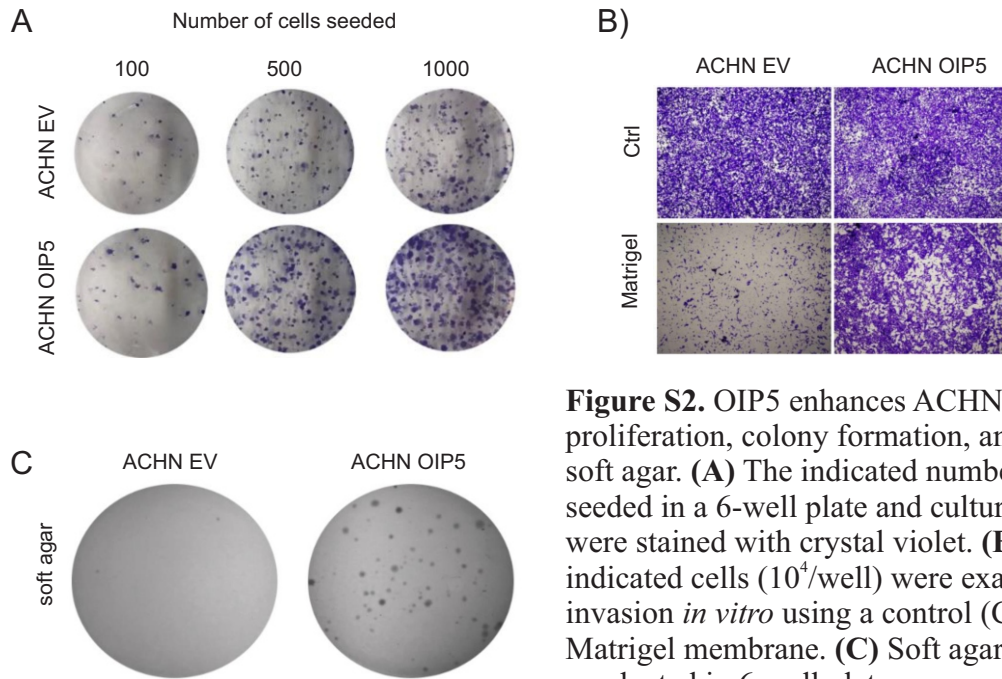

**Figure S2.** OIP5 enhances ACHN cell proliferation, colony formation, and growth in soft agar. **(A)** The indicated number of cells were seeded in a 6-well plate and cultured. Colonies were stained with crystal violet. **(B)** The indicated cells ( $10^4$ /well) were examined for invasion *in vitro* using a control (Ctrl) and Matrigel membrane. **(C)** Soft agar assay was conducted in 6-well plate.
