# Supplementary material for: Prognostic and Therapeutic Potential of the OIP5 Network in Papillary Renal Cell Carcinoma
Source: MDPI journal article supplement (doi:10.3390/cancers13174483), 2021-09-06
Supplement: s1 [file s1]

Figure S10

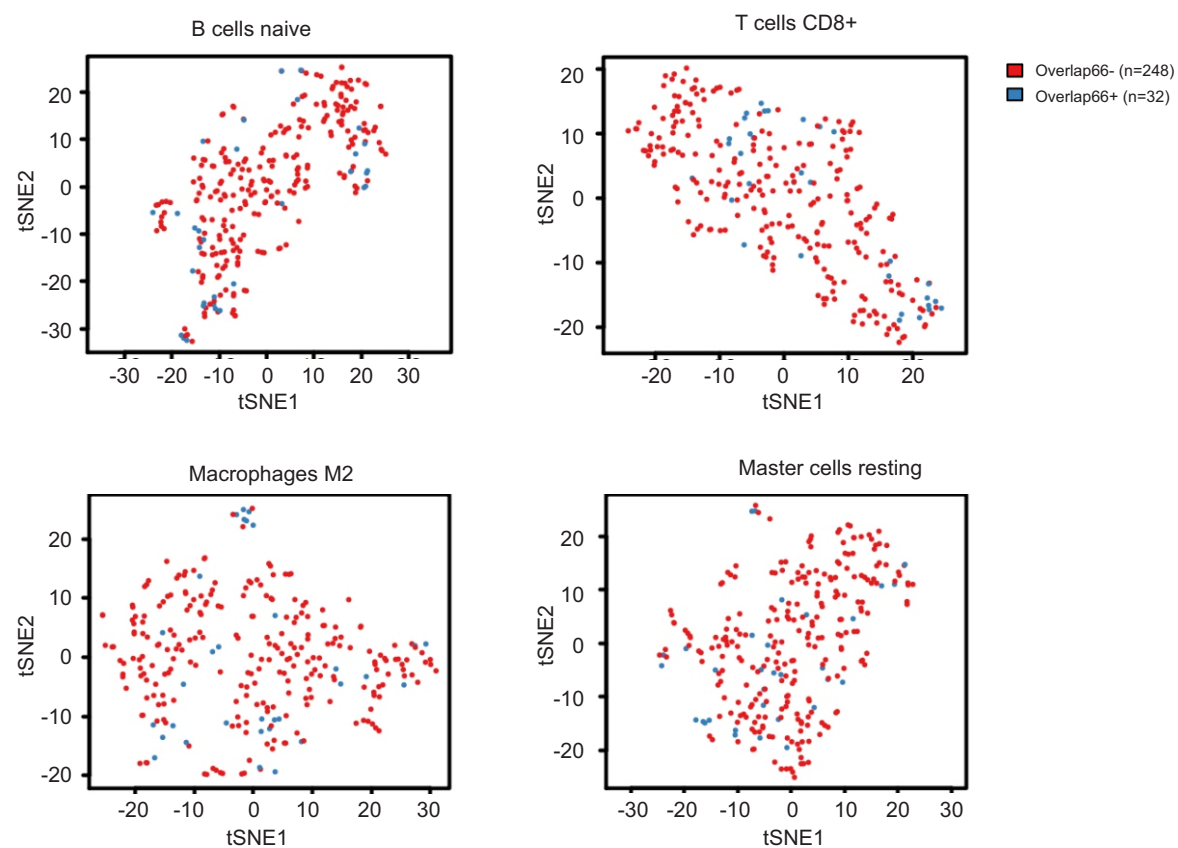

**Figure S10.** Clustering of the indicated immune cell subsets with tSNE. The graph was produced using the high-resolution mode within CIBERSORTx (<https://cibersortx.stanford.edu/index.php>) (see ref 47).
