# Supplementary material for: Prognostic and Therapeutic Potential of the OIP5 Network in Papillary Renal Cell Carcinoma
Source: MDPI journal article supplement (doi:10.3390/cancers13174483), 2021-09-06
Supplement: s1 [file s1]

Figure S7

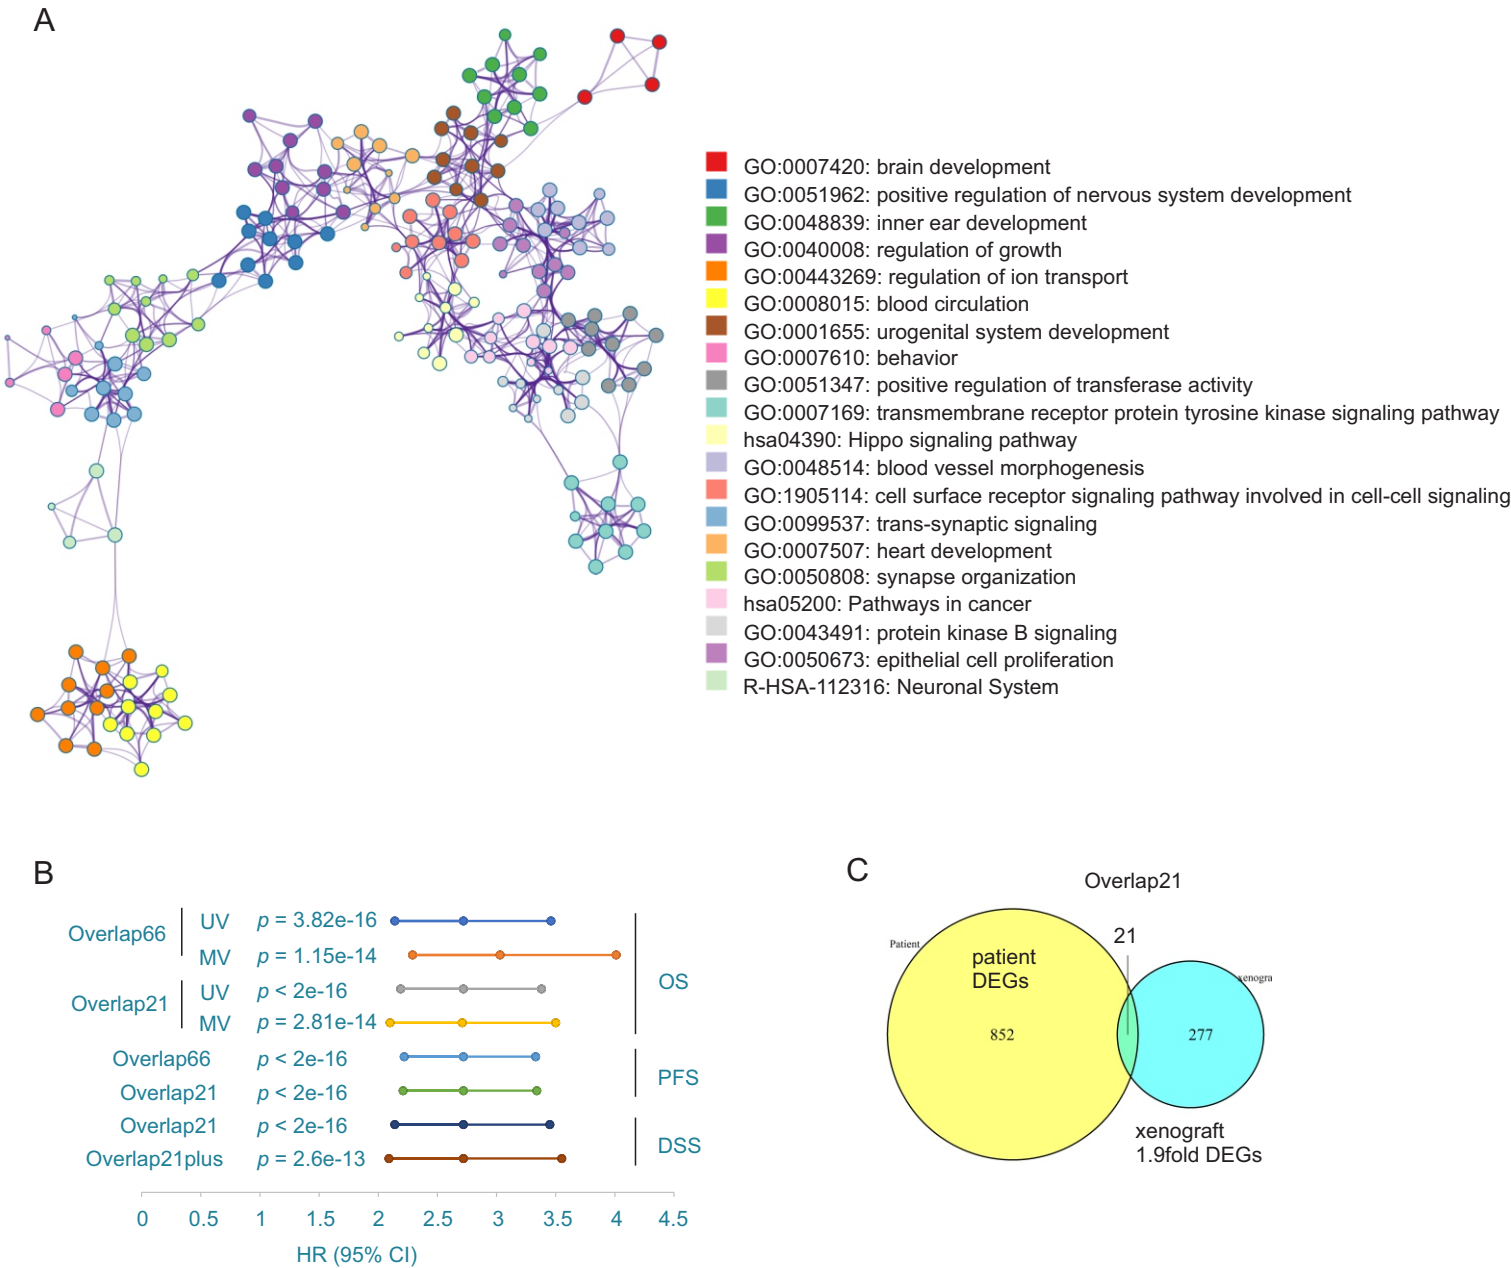

**Figure S7.** Prediction of OS, PFS, and DSS possibilities by Overlap66, Overlap21, and Overlap21plus. **(A)** Network connection of individual enriched terms within individual clusters (see Fig. 4a, Additional file 10: Table S4 for details). **(B)** The predictions of OS, PFS, and DSS possibility using Overlap66, Overlap21, and Overlap21plus risk scores. UV and MV: univariate and multivariate Cox analysis, HR: hazard ratio, and CI: confidence interval. **(C)** The number of overlapping genes between primary (patient) pRCC-derived DEGs and DEGs obtained from xenografts at fold change  $\geq |1.9|$ .
