# Supplementary material for: Prognostic and Therapeutic Potential of the OIP5 Network in Papillary Renal Cell Carcinoma
Source: MDPI journal article supplement (doi:10.3390/cancers13174483), 2021-09-06
Supplement: s1 [file s1]

Figure S1

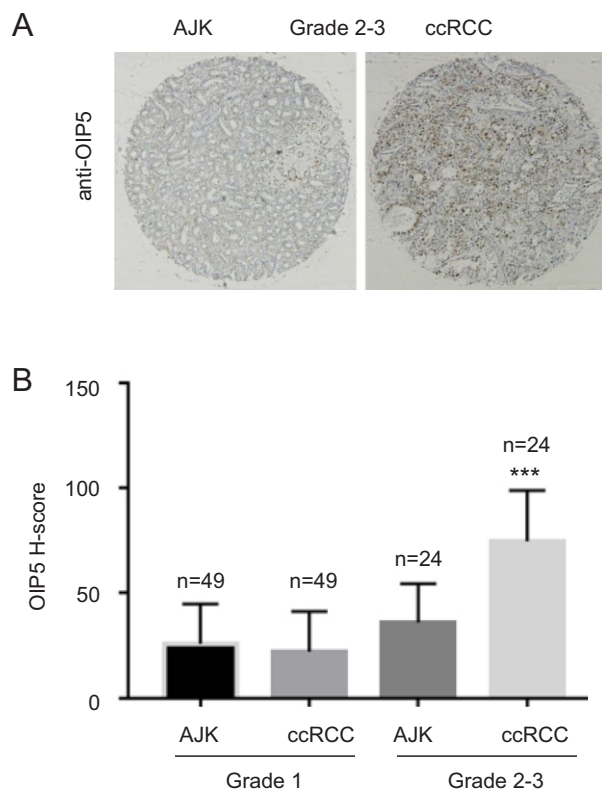

**Figure S1.** OIP5 upregulation in ccRCC. OIP5 expression was determined by IHC in a RCC tissue microarray and quantified using H-score. Typical images (**A**) and quantifications (mean  $\pm$  SDs) (**B**) are presented. \*\*\*:  $p < 0.001$  in comparison to the respective AJK tissues by 2-tailed Student t-test.
