# Supplementary material for: Prognostic and Therapeutic Potential of the OIP5 Network in Papillary Renal Cell Carcinoma
Source: MDPI journal article supplement (doi:10.3390/cancers13174483), 2021-09-06
Supplement: s1 [file s1]

Figure S9

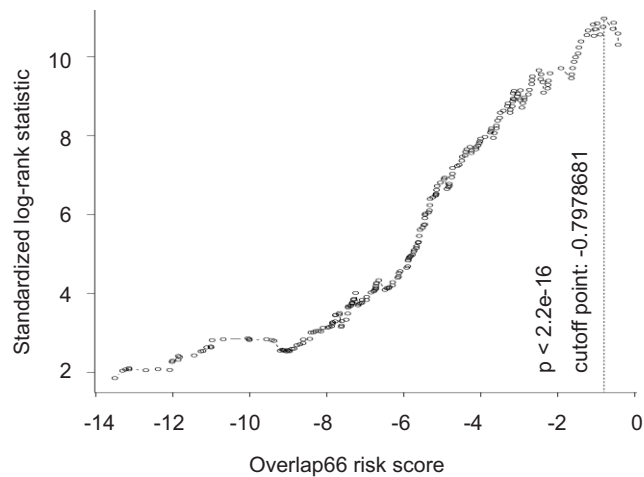

**Figure S9.** Cutoff point of Overlap66 risk score in the estimation of OS shortening. The cutoff point was determined using Maximally Selected Rank Statistics (the *Maxstat* package) in R.
