# Supplementary material for: Prognostic and Therapeutic Potential of the OIP5 Network in Papillary Renal Cell Carcinoma
Source: MDPI journal article supplement (doi:10.3390/cancers13174483), 2021-09-06
Supplement: s1 [file s1]

Figure S5

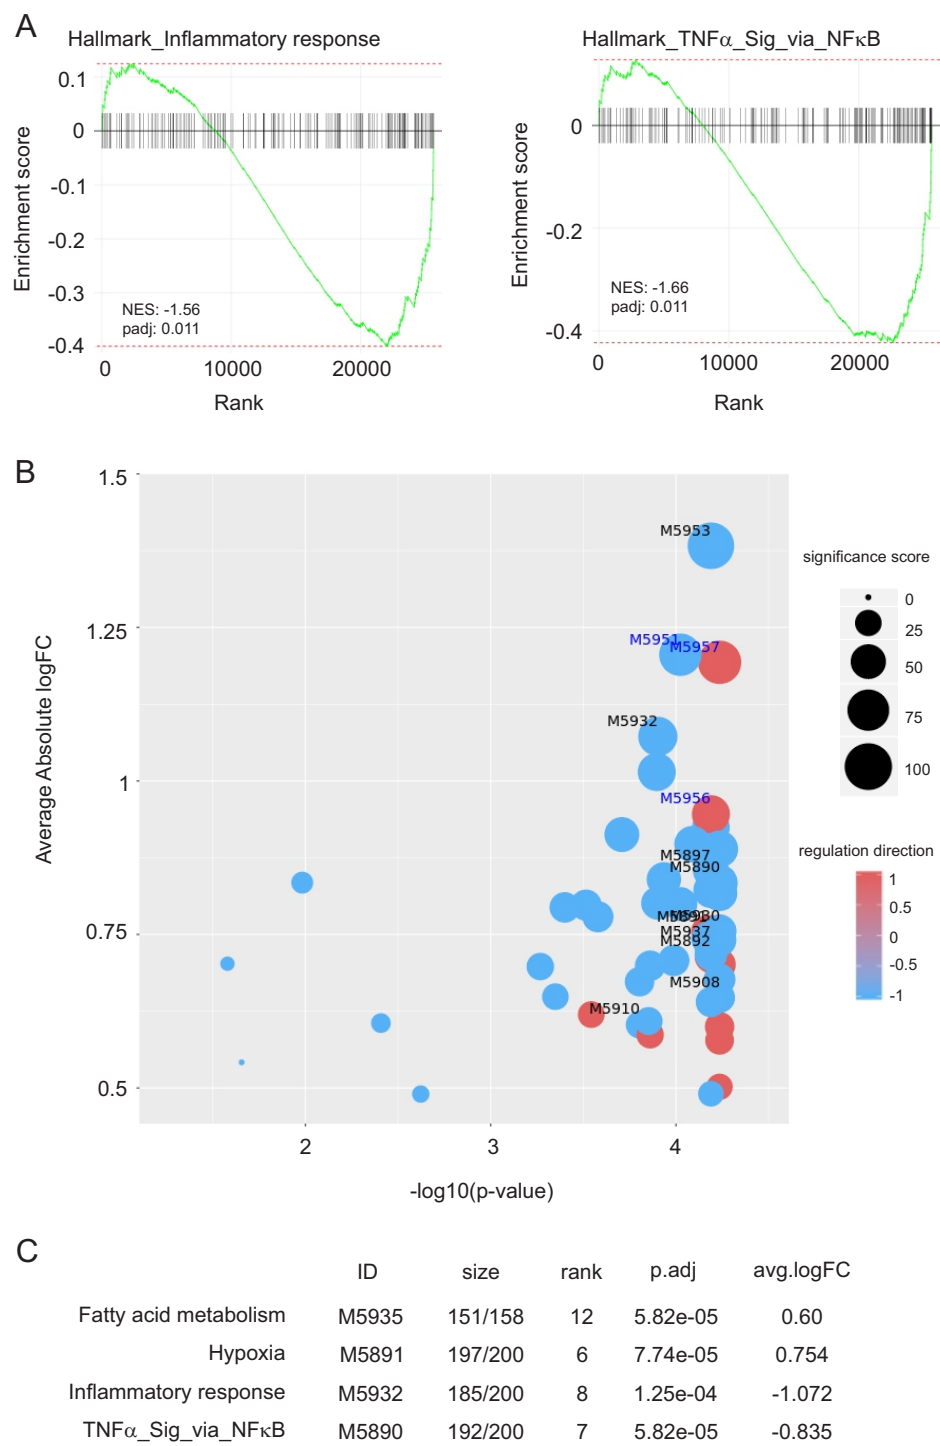

**Figure S5.** Enrichment of h-Hallmarks Gene Set collection in ACHN OIP5 tumors. **(A)** Enrichment was analyzed using FGSEA within the Galaxy platform. **(B, C)** Enrichment analyses were performed using EGEA by UseGalaxy.org. The summary plot of mean absolute fold change ( $\log_2\text{FC}$ ) and p.adj value (B). The details of the indicated gene sets, which were also derived from FGSEA analysis [panel A, Figure 3C], are presented (C).
