# Supplementary figures and images for: Prognostic and Therapeutic Potential of the OIP5 Network in Papillary Renal Cell Carcinoma
Source: MDPI journal article supplement (doi:10.3390/cancers13174483), 2021-09-06

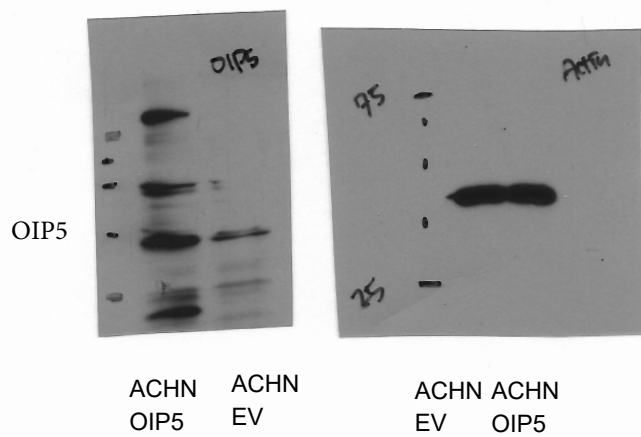

Supplement: s1 [file s1]
